# Supplementary material for: “I felt like a lone ranger”: experiences of Australian families living with KIF1A-Associated Neurological Disorder
Source: J Community Genet. 2026 Jun 8;17(3):73. doi: 10.1007/s12687-026-00908-5 (PMC13243148; doi:10.1007/s12687-026-00908-5)
Supplement: Supplementary file 2 — Supplementary Material 2 [file 12687_2026_908_MOESM2_ESM.xlsx]

## Sheet: Sheet1
CATEGORY & SUBCATEGORY	PARTICIPANT QUOTES
Healthcare experiences
Parental concerns not taken seriously	"We saw a paediatrician, but he was very conservative, I’d say. He wouldn't pursue much of like the genetic tests." P03 "And he's kind of like, it's okay, let's just take our time. She's still too young. I'm like, I don't want, I want to know if, when she's still young so that I know how to support her. I don't want to know when she's three or four years old." P03 "Well, he was diagnosed with cer…
Frustration and distress over delayed diagnosis	“[Our diagnosis journey] was a long, painful, hurtful, emotional rollercoaster.” P11 "No one could give me any idea of what was happening and that continued for a few years" P04 "Because up until then, yeah, yeah, we were still under the blanket umbrella term of cerebral palsy with unknown real cause, but didn't quite fit with everything else. And so that was the difficulty, it was just the not q…
Feeling isolated and overwhelmed	“And I think it's tough in the sense that no one, he didn't even know anything about it, so where do you go when you find out this terrible news – your whole life has changed – but no one knows anything about it. And even your doctors.” P09
	“I felt like it's me and [my daughter] against the world, but [my daughter] is ignoring me. And can you imagine how lonely that is?” P02
Difficulty finding knowledgeable clinicians	“A list of specialists that actually know what they're talking about would be beneficial because you're just in the dark.” P14
	"We had no less than four neurologists in three years. Every time we went there was a different neurologist. Every time we went there, we had to re-explain the disease because they didn't do their homework. Which is very frustrating." P03
	“The shopping around [for knowledgeable clinicians] is draining and difficult.” P14
	“I went to the doctor the other day to get a referral for her to see a paediatrician, and I told the doctor she's got KIF1A and he said I don't know what that is. And every doctor I mentioned, no one knows anything.” P09
	“You just have to...try and take on board what therapists say and doctors say and bleed out the ones that seem to have no bloody idea what they're talking about – which is difficult, because you don't know until you're a year or two in and go: what are you talking about? You seem to have no comprehension of what this is.” P14
Impact on family
Navigating complex and unpredictable health challenges	“With myself and a lot of the other guys we talked to, the complex needs are really hard to navigate, cause a lot of people will be like right, my son's got behavioural needs. That's all I need to take care of. Whereas [my son] has got about ten things I need to take care of. And it's really hard to navigate that to get the help you need.” P11
	Behavioural
	“And we turn up and then a roller coaster or a ride makes this noise, and then that's it. He's done. And it's a proper anxiety attack, and he’ll flip out and there's no way to calm him back down.” P11
	“That's the hardest part, is having a constant 5-year-old that's never going to grow up.” P14
	“Often, if his iPad goes flat, he'll throw it across the room as well. We've had two windows broken and about five broken iPads because of that as well, because he just starts whacking things. So that's always been a challenge.” P13
	"Because her cognition's not great, she'll just walk off a path...and down a hill into a creek, so we have to be spot on with her all the time to make sure that she's safe. We can't just let her run off and run around like other kids, even in her walking frame." P10
	Communication
	“She was nonverbal. Man, that was hard. And everything was binary choices. She couldn't nod her head. She could make sounds, so I'd use intonation.” P12 "We've learnt to communicate with him, but it’s been a long journey, because even four years ago, we didn't even understand what he wanted half the time. But now we do understand what he wants." P13 "We, in preparation for school for kindy, we ro…
	Vision
	“Her vision’s never been great...She's always struggled to see things far away from her with clarity. So you can't just point across a park and say, 'Oh look, Nana’s over there', because she just won't see...She can't see steps or hills or bumps or that sort of thing when she's out walking so we have to be right there.” P10
	Mobility
	"She can't use a knife. The fork has to be positioned in the right spot. You’ve gotta help her get into her chair for dinner and lunch and out of her chair. You gotta brush her teeth. You gotta take her to the toilet." P10
A multifaceted burden of caregiving	Financial strain
	“I'm wishing we had have done more with him when he was younger, but we were too busy providing him with speech therapy and OT and physio that we had no money to be able to go anywhere.” P06
	"My wife would like to work full time. She's not able to cause we're dealing with the NDIS. That's actually costing her probably $20,000 a year in lost wages." P13
	Administrative stresses
	"I think one of the one of the biggest things that I struggle with that's not necessarily, like it’s probably all the extra admin that comes with having a kid with a disability that other people don't think about. Like we've gotta sign up for a school holiday program, and the amount of work required to get [my daughter] set up in their database is ridiculous and daunting and takes so much more ti…
	“It's constantly about the girls. And yeah even the home, it's all wheelchair friendly and done and yeah. It's just, yeah, you're planning, paperwork all the time for NDIS and what's next? Tomorrow's Botox. And you're filling in paperwork for hospitals.” P05
	Emotional strain
	“That repetition, day in and day out, and trying to just get her to understand that this means yes, and that means no. Or like, you know, this means no, this means yes. That repetition for years and years that you kind of start wondering, when will this gonna be over? And how long do I have to do it for? If you carry it every day, I think it can plague you.” P02
	"Yeah, every day's a struggle. Every day is difficult. You know, some days are good, some days are worse." P08
	"Like it's draining. And the fact that she's never going to change. That's the rest of my life. It is what it is. So, you just, you just carry on. It's alright." P14
	Relationship strain
	“There is no me and my husband. It's just me and the kids, or him and the kids, or us and the kids.” P03
	"There's no ability for just [my husband] and I to have a weekend away, or any time for us just to take [my daughter without KAND] and [my son without KAND] away just to give them some respite. Because they're constantly around it as well." P06
	“Lots of stresses and relationship stresses [KAND] causes...We got one parent that buries their head in the sand over the disability and won't contribute to decisions, it makes it very difficult.” P14
Unmet support needs
Lack of adequate information resources	“When we turned up the neurologist at the time said we don't know much, or the geneticist at the time, said we don't know much about it. Here’s six sheets of paper. This is what it is. See you later. And we were sent on our merry way with six sheets of research documents, not actually telling us what his diagnosis was.” P06
	"How to connect with different professionals, how to connect with the NDIS. That's the thing that the parents need. How do I kickstart this journey?" P12
	"I think more concrete knowledge of what the landscape is in terms of – because obviously it's a big spectrum in terms of the severity of the disease and the potential ways it can present and progress – so I think building that knowledge so that we know what particular mutations have what overall kind of branching phenotype to them would be useful, and would help in terms of planning for the futu…
	“I know I went straight to Google and then it says there, life expectancy 5 to 7 years. And that's horrible to read...So I think if you could provide a simplified version of information that people can go to instead of Google, that will alleviate a lot of pain and anxiety.” P09
Difficulty seeking formal support	“You just find out bits and pieces from different doctors and yeah, there's not that network of going to the hospital and saying 'well where do I go for help?'” P05
	“The thing is, the NDIS doesn't support rare diseases well. Unless they're a recognised disease, they're not interested. In fact, to the point where you’re better off telling the NDIS it’s cerebral palsy in order to get the correct support.” P13
	“I don't think the NDIS have a good grasp of what is required for these kids. I think that's another issue that needs to be, cause there is no box for KIF1A. So they don't understand it and they don't help.” P03
	“I'd approached the council about getting a disabled parking spot out the front of my house. And I got turned down like two or three times.” P01
	“And I think it's common in all kids, all parents of kids with disabilities, again not isolated to KAND, but not knowing what supports are out there for their kids. And like I had one mum say to me the other day, I didn't know I could get a disability car park.” P10
	“If somebody was helping with [my son with KAND], you know, even a couple of hours a day, we get a lot more done and there's a lot less stress.” P03
Lack of certainty around long-term care	“But what scares us for the future is also, if anything did happen to us, that we are [my son’s] biggest advocates, that there may not be that support for him like he has now.” P06 "And I just want to make sure that [my son] is looked after. Because I'm 66, so I just want to make sure that down the track, he's going to be looked after. But I know it's going to be very difficult because as he's ge…
Coping strategies
Peer support networks provide connection and practical information	“I think the best thing that people can do is honestly to get involved in the community and talk to other families, and that's what most people find helps. Because you can talk to all the medical professionals that you want, but I can tell you right now, your physiotherapist or OT that rocks up to talk about your son or daughter, they're not going to know as much as someone like myself who's been…
	“To be able to speak with other parents, to be able to communicate with other children that are very much on the same level as your own child, gave us hope.” P06
Focusing on abilities, not limitations	“She is growing and learning, but it's just slower than everybody else.” P08
	“The number of kids talking to her – her language took off...Mainstream, was super good for [my daughter] and her language. Now we just can't get her to stop talking.” P12
	“You just gotta enjoy the moment a little bit as well and again like I said before, you’ve got to try not to overthink it.” P15
